# Supplementary figures and images for: Orphan receptor GPR158 controls stress-induced depression
Source: eLife journal article supplement (doi:10.7554/elife.33273), 2018-02-08

# Figure 7-figure supplement 1

A

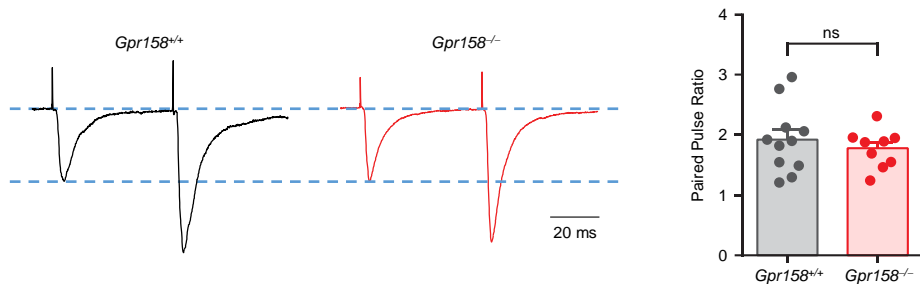

B

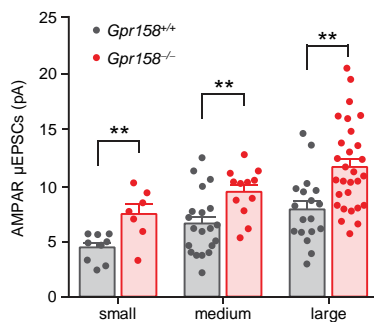

C

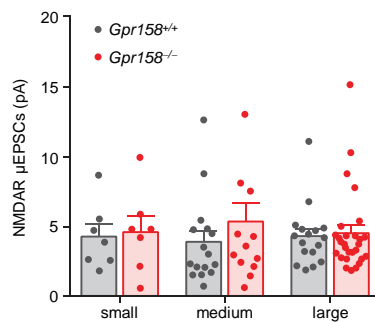

D

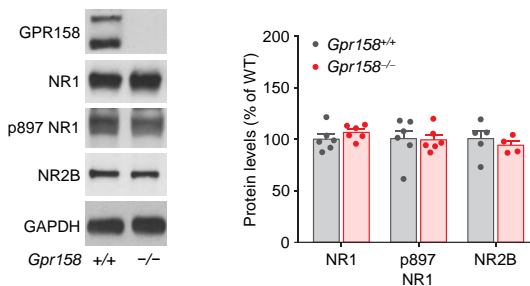

Supplement: supp [file elife-33273-supp-v1.zip]

# Figure 5-figure supplement 2

A

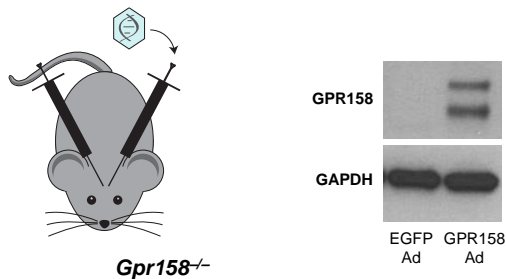

B

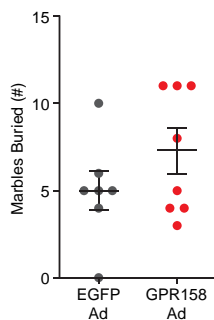

C

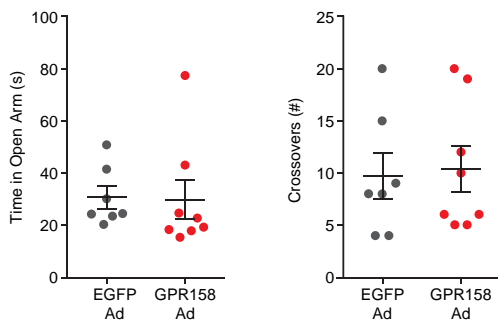

D

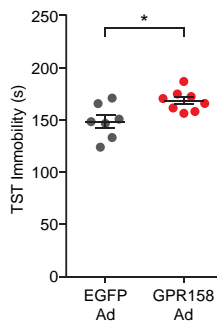

E

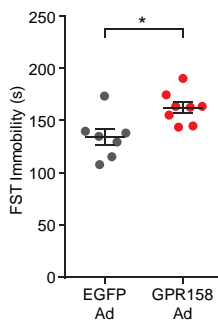

F

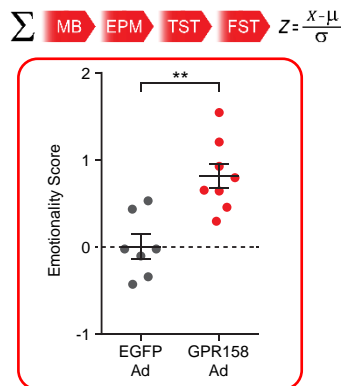

Supplement: supp [file elife-33273-supp-v1.zip]

**Figure 1-figure supplement 2**

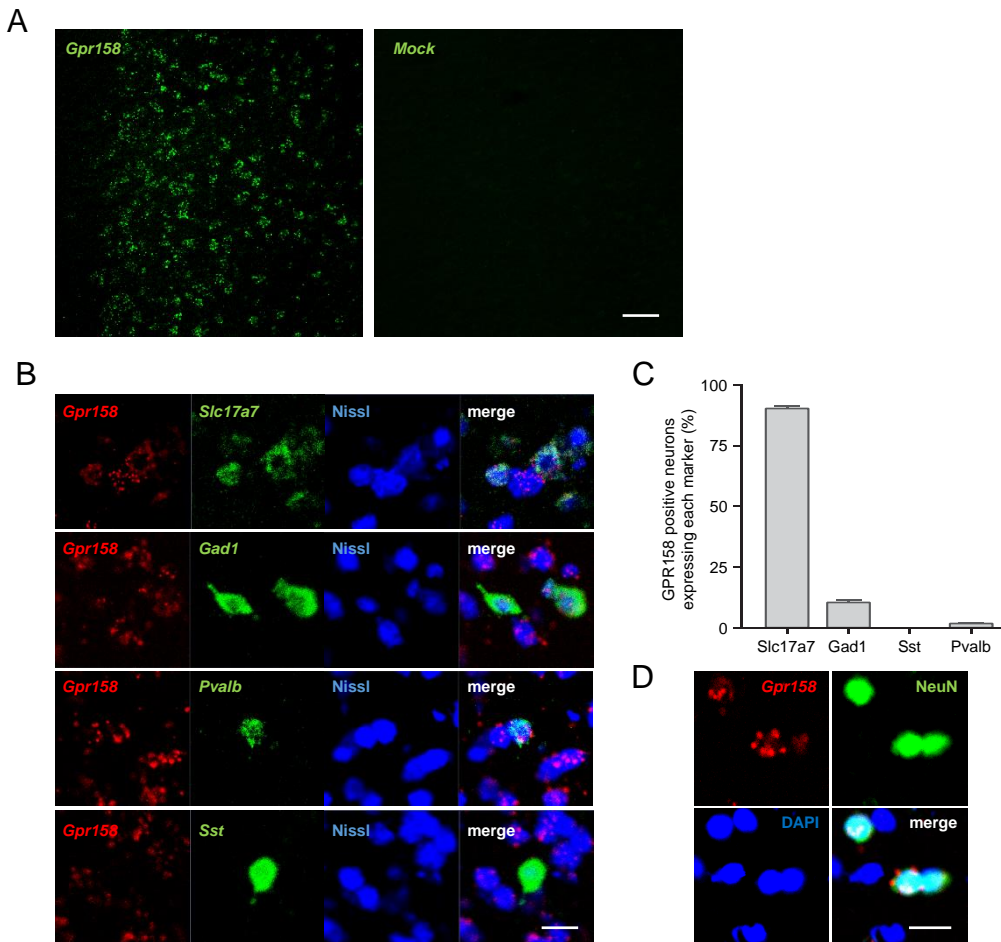

Supplement: supp [file elife-33273-supp-v1.zip]

# Figure 4-figure supplement 1

A

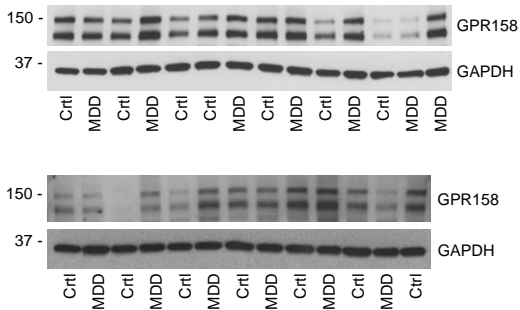

B

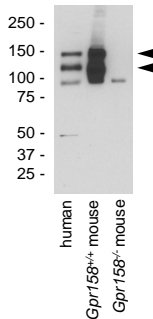

Supplement: supp [file elife-33273-supp-v1.zip]

**Figure 5-figure supplement 1**

**A**

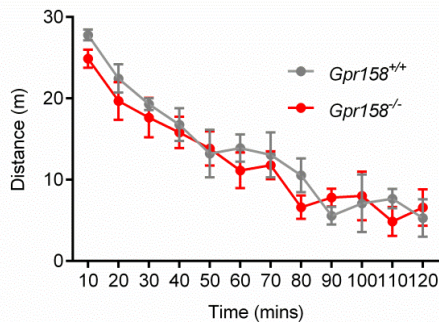

**B**

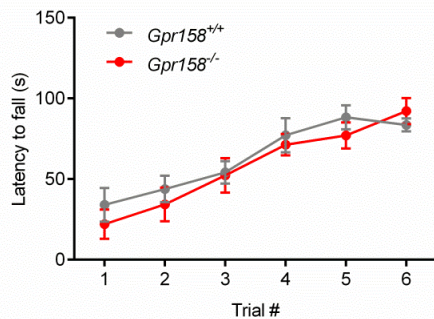

**C**

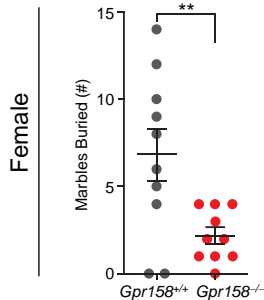

**D**

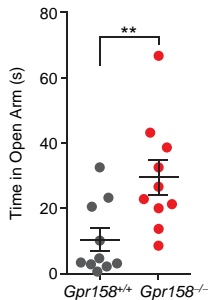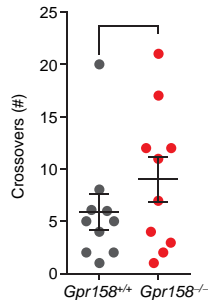

**E**

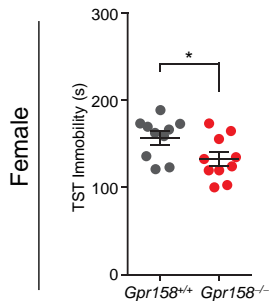

**F**

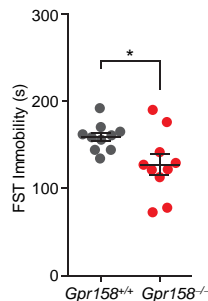

**G**

$$\sum \text{MB} \text{ EPM} \text{ TST} \text{ FST} \quad Z = \frac{X - \mu}{\sigma}$$

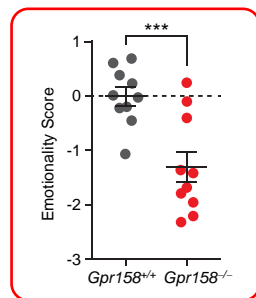

Supplement: supp [file elife-33273-supp-v1.zip]

# Figure 1-figure supplement 1

A

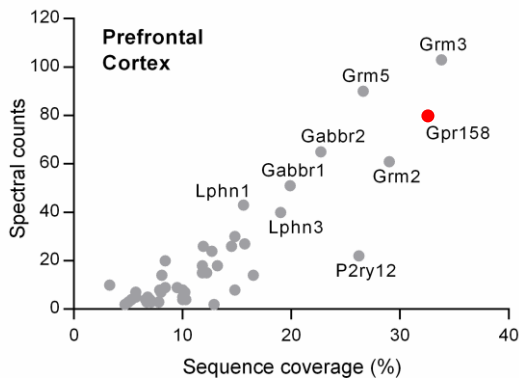

B

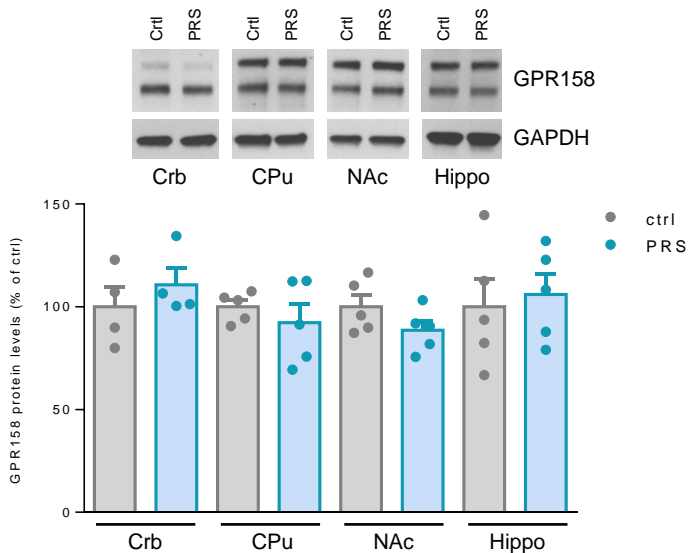

Supplement: supp [file elife-33273-supp-v1.zip]
